# Supplementary material for: Sec14-nodulin proteins and the patterning of phosphoinositide landmarks for developmental control of membrane morphogenesis
Source: PubMed Central journal article supplement — Mol Biol Cell. 2015 May 1;26(9):1764–81. doi: 10.1091/mbc.E14-10-1475 (PMC4436786; doi:10.1091/mbc.e14-10-1475), 2015-05-01
Supplement: supp_E14-10-1475v1_CombinedSupMats.pdf [file supp_E14-10-1475v1_CombinedSupMats.pdf]

# Supplemental Materials

*Molecular Biology of the Cell*

Ghosh et al.

# SUPPLEMENTAL MATERIALS

## Sec14-Nodulin Proteins Pattern Phosphoinositide Landmarks For Developmental Control of Membrane Morphogenesis

Ratna Ghosh<sup>1‡</sup>, Marília K.F. de Campos<sup>2‡</sup>, Jin Huang<sup>1</sup>, Seong K. Huh<sup>1</sup>, Adam Orlowski<sup>3</sup>, Yuan Yang<sup>4</sup>, Ashutosh Tripathi<sup>1</sup>, Aaron Nile<sup>1</sup>, Hsin-Chieh Lee<sup>2</sup>, Marek Dynowski<sup>5</sup>, Helen Schäfer<sup>2</sup>, Tomasz Róg<sup>3</sup>, Marta G. Lete<sup>6</sup>, Hasna Ahyauch<sup>6,7</sup>, Alicia Alonso<sup>6</sup>, Ilpo Vattulainen<sup>3,8</sup>, Tatyana I. Igumenova<sup>4</sup>, Gabriel Schaaf<sup>2\*</sup>, and Vytas A. Bankaitis<sup>1,4,9</sup>

<sup>1</sup>Department of Molecular and Cellular Medicine, College of Medicine  
Texas A&M Health Sciences Center  
College Station, Texas 77843-1114, USA

<sup>2</sup>ZMBP, Plant Physiology, Universität Tübingen  
72076 Tübingen, Germany

<sup>3</sup>Department of Physics  
Tampere University of Technology  
FI-33101 Tampere, Finland

<sup>4</sup>Department of Biochemistry & Biophysics  
Texas A&M University  
College Station, Texas 77843-2128

<sup>5</sup>ZDV, Universität Tübingen  
72074 Tübingen, Germany

<sup>6</sup>Unidad de Biofísica (CSIC, UPV/EHU), Departamento de Bioquímica,  
Universidad del País Vasco, Leioa, Spain

<sup>7</sup>Institut de Formation, aux Carrieres de Sante de Rabat (IFCSR)  
Rabat, Morocco

<sup>8</sup>MEMPHYS – Center for Biomembrane Physics  
University of Southern Denmark  
DK-5230, Odense M, Denmark

<sup>9</sup>Department of Chemistry  
Texas A&M University  
College Station, Texas 77843-2128

## SUPPLEMENTAL FIGURE LEGENDS

**Supplemental Figure S1.** Localization of Class I-III nodulins in yeast. The indicated GFP-tagged **(A)** Class II and **(B)** Class III nodulins were expressed and localized in WT yeast cells. Images are representative of 130, 103, 103, 94, 126, 102 and 138 cells expressing AtSfh4, AtSfh5, AtSfh6, AtSfh8, AtSfh9, AtSfh13 and AtSfh14 nodulins, respectively. Cells expressing GFP-AtSfh6, -AtSfh9, -AtSfh13 and -AtSfh14 nodulins showed exclusive cytoplasmic localization for each of the corresponding chimeras, whereas the GFP-AtSfh4 and -AtSfh5 nodulins localized to the nucleus as evidenced by DAPI co-staining. GFP-AtSfh8 nodulin showed a dual PM and cytoplasmic localization as 67% of the cells showed both PM and cytoplasmic profiles for the GFP-chimera and 33% showed exclusively cytoplasmic profiles. **(C,D)** Localization of Class I nodulins is PtdIns(4,5)P<sub>2</sub>-dependent. Confocal images of GFP-tagged AtSfh3, AtSfh7 and AtSfh10 nodulins expressed in yeast carrying: **(C)** four independent temperature sensitive alleles of the Mss4 PtdIns(4)P 5-OH kinase responsible for production of PtdIns(4,5)P<sub>2</sub>, and **(D)** temperature sensitive alleles of the genes encoding each of the two essential yeast PtdIns-4-OH kinases (*pik1<sup>ts</sup>* and *stt4<sup>ts</sup>*) responsible for PtdIns(4)P production and of the potentiator of PtdIns 4-OH kinase activity Sec14 (*sec14<sup>ts</sup>*) as indicated. Transformants of a *vps34Δ* strain lack the non-essential PtdIns 3-OH kinase required for production of both PtdIns(3)P and PtdIns(3,5)P<sub>2</sub>. None of the lipid kinase defects of panel D affect PtdIns(4,5)P<sub>2</sub> levels under the conditions of these experiments, and inactivation of any one of these functions fails to release Class I nodulins from the PM. But, all Class I nodulins are released from the PM upon reduction of PtdIns(4,5)P<sub>2</sub> levels. All *ts* alleles have 22°C and 37°C as permissive and restrictive temperatures, respectively. Corresponding DIC and GFP confocal image panels are identified. Scale bars: 2 μm.

For panel (C), images are representative of an aggregate of 1284 and 1460 cells imaged at 22°C and 37°C, respectively, and 70-169 cells were scored for each nodulin at each temperature. In all cases, >96% of the cells imaged at 22°C showed PM localization of the GFP-nodulin reporter whereas, in all cases, >90% of the cells imaged at 37°C showed exclusively cytoplasmic localization for the indicated GFP-nodulin reporter. GFP-nodulin profiles were also imaged in WT yeast at 22°C (aggregate of 829 cells) and 37°C (aggregate of 292 cells). As expected, at both temperatures, >99% of the cells showed exclusively PM localization profiles. For panel (D), 32-302 cells were imaged for each mutant at each temperature. For each mutant and condition, >89% of the cells imaged showed exclusive PM localization for the indicated GFP-nodulin reporter.

**Supplemental Figure S2.** Localization of WT and mutant AtSfh1 nodulin domains in transiently expressing tobacco leaf epidermal cells and AtSFH1 nodulin-dependent PtdIns(4,5)P<sub>2</sub> homeostasis in Arabidopsis root hairs. *Nicotiana benthamiana* leaves transiently expressing mRFP-tagged WT nodulin and mutant versions with indicated single **(A)** and multiple **(B)** Lys to Ala substitutions were imaged by confocal scanning microscopy. A Bri1-GFP fusion was co-transfected as a plasma membrane marker. Merged and brightfield images are shown. Scale bars: 5 μm. **(C)** Proteins expressed in this experiment are stable as indicated by immunoblot analyses. **(D)** Loss of tip-directed PtdIns(4,5)P<sub>2</sub> gradients in *Atsfh1*<sup>0/0</sup> plants expressing *Atsfh1* mutant transgenes. PtdIns(4,5)P<sub>2</sub> distribution was visualized as PH<sub>PLCδ1</sub>-YFP fluorescence in 3-day old *Atsfh1*<sup>0/0</sup> seedlings expressing: the *AtSFH1* (WT) transgene, the indicated transgenes with single K → A substitutions in the nodulin peptide that yield partially functional AtSfh1 proteins, or transgenes driving expression of the indicated multiply K → A substituted AtSfh1 proteins that

are biologically non-functional (bottom panel). The tip directed PtdIns(4,5)P<sub>2</sub> accumulation is highlighted by arrows. Scale bar: 10µm.

The relative intensities of PH<sub>PLCδ1</sub>-YFP fluorescence at the tip plasma membrane (PM) vs cortical PM were calculated using the Image J tool to measure line-scan intensities perpendicularly across tip and cortical membrane at three different positions for each TIFF image file by plot profiling. Background correction was applied to all the images before line scan. The maximum pixel intensities recorded across each set of line scans were averaged for tip PM to cortical PM. These values were used to generate tip PM/cortical PM fluorescence intensity ratios that were interpreted as semi-quantitative readouts for tip-directed PtdIns(4,5)P<sub>2</sub> gradients. In the WT case the tip PM/cortical PM intensity ratio was 4.2, a value in excellent agreement with our previous ratiometric imaging measurements that reported 3- to 4-fold PtdIns(4,5)P<sub>2</sub> enrichments in tip PM relative to cortical PM in growing root hairs (Vincent et al., 2005). AtSfh1-deficient root hairs reconstituted with the hypomorphic AtSfh1<sup>K5A</sup> and AtSfh1<sup>K6A</sup> proteins exhibited tip PM/cortical PM intensity ratios of 2.5 and 2.1, respectively. AtSfh1-deficient root hairs reconstituted with the functional null AtSfh1<sup>K3,5A</sup>, AtSfh1<sup>K4,5A</sup>, AtSfh1<sup>K3,4,5A</sup>, and AtSfh1<sup>K1-7A</sup> polypeptides exhibited tip PM/cortical PM intensity ratios of 1.2, 0.9, 0.7, and 0.5, respectively.

**Supplemental Figure S3.** High affinity of AtSfh1 nodulin for PtdIns(4,5)P<sub>2</sub> and gel filtration profiles of Class II nodulins. **(A)** Time course analysis of FM4-64 internalization in yeast. PMs of WT cells expressing GFP, GFP-AtSfh1 nodulin or GFP-AtSfh1<sup>K1-7A</sup> nodulin were loaded with FM4-64 dye (10 µM) at 0°C, warmed to 30°C and imaged at each of the indicated time points. Scale bars: 5 µm. For the GFP and GFP-AtSfh1<sup>K1-7A</sup> nodulin-expressing cells, 100-349 cells

were imaged and scored for each time point. At 2 min, 60% and 47% of the GFP cells and 53% and 43% of the GFP-AtSfh1<sup>K1-7A</sup> cells showed both PM + endosome or only endosome staining, respectively. In both cases, 100% of the cells showed only endosomal staining at 7.5 min, both endosomal and vacuolar staining at 12 min, and exclusively vacuolar staining by 15 min. The kinetics of FM4-64 chase were delayed in GFP-AtSfh1-expressing cells. At 2 min, 87% and 13% of the cells showed both PM + endosome or only endosome staining, respectively, 81% of the cells still showed PM + endosome staining at 7.5 min. At 12 min, 90% of the cells showed label in PM, endosomes and vacuoles and >90% of cells still exhibited detectable PM pools of FM4-64 at 15, 30 and 60 min. **(B)** An mRFP tagged AtSfh1 nodulin remains on the plasma membrane in a yeast temperature sensitive PtdIns 4-P 5-OH kinase mutant (*mss4-102<sup>ts</sup>*) at a semi-permissive temperature (26°C, left panel). By comparison, targeting of the tandemized PtdIns(4,5)P<sub>2</sub> biosensor GFP-2XPH<sup>PLC $\delta$</sup>  to the PM was compromised at 26°C in the same *mss4-102<sup>ts</sup>* strain (right panel). The pRS426-GFP-2XPH<sup>PLC $\delta$</sup>  plasmid expressing the tandemized biosensor was obtained from Addgene (plasmid 36092). Scale bars: 5  $\mu$ m. **(C)** Measurement of the binding of AtSfh1 nodulin C-terminal 12-mer peptide and the mutant peptides K<sub>5</sub>A and K<sub>3,5</sub>A (peptide sequences at bottom) to small unilamellar vesicles (SUVs) containing 3 mol% PtdIns(4,5)P<sub>2</sub> by isothermal titration calorimetry. Top panel: heat exchange after the successive injections. Bottom panel: heat per mole of lipid as a function of lipid:peptide molar ratio. **(D)** Table showing thermodynamic parameters of binding of wild-type and mutant peptides to large unilamellar vesicles (LUVs). Data (average values  $\pm$  S.D., n = 2-3) were obtained from experiments as the one shown in C. **(E)** Plot of association constants K<sub>2</sub> (data obtained from Table shown in D) of WT and mutant nodulin peptides binding to liposomes containing 3 mol% PtdIns(4,5)P<sub>2</sub>. Unpaired t-test p value is shown (mutant compared to WT). **(F)** Gel filtration

profile for purified native AtSfh5 nodulin. **(G)** Gel filtration chromatogram for purified native AtSfh8 nodulin. Immunoblot profiles across the elution window are shown in the upper panels at top, and elution positions for the indicated standards are identified by arrows.

**Supplemental Figure S4.** Localization of AtSfh1 nodulin proline substitution mutants in yeast deficient in defined lipid kinase activities. Confocal images of GFP-tagged AtSfh1 nodulin domains harboring the indicated single and double proline missense substitutions expressed in yeast carrying: **(A)** four independent temperature sensitive alleles of the Mss4 PtdIns(4)P 5-OH kinase responsible for production of PtdIns(4,5)P<sub>2</sub>, and **(B)** temperature sensitive alleles of the genes encoding each of the two essential yeast PtdIns-4-OH kinases (*pik1<sup>ts</sup>* and *stt4<sup>ts</sup>*) responsible for PtdIns(4)P production and of the potentiator of PtdIns 4-OH kinase activity Sec14 (*sec14<sup>ts</sup>*) as indicated. *vps34Δ* mutants lack the non-essential PtdIns 3-OH kinase required for production of both PtdIns(3)P and PtdIns(3,5)P<sub>2</sub>. None of the lipid kinase defects of panel B affect PtdIns(4,5)P<sub>2</sub> levels under these experimental conditions, and inactivation of any one of these enzymes fails to release the mutant nodulins from the PM. But, both mutant Class I nodulins were released from the PM upon reduction in PtdIns(4,5)P<sub>2</sub> levels. All *ts* alleles have 22°C and 37°C as permissive and restrictive temperatures, respectively. DIC and GFP panels are labeled. Scale bars: 5 μm.

For panel (A), images are representative of an aggregate of 399 and 395 and 220 and 227 cells imaged for GFP-AtSfh1<sup>E485P</sup> and GFP-AtSfh1<sup>E485P,Y474P</sup> nodulins at 22°C and 37°C, respectively (41-155 cells were scored for each nodulin at each temperature). In both cases, >94% of the cells imaged at 22°C showed exclusively PM localization of the GFP-nodulin reporter whereas, in both cases, >93% of the cells imaged at 37°C showed exclusively

cytoplasmic localization for the indicated GFP-nodulin reporter. GFP-nodulin profiles were also imaged in WT yeast at 22°C (aggregate of 105 cells) and 37°C (aggregate of 143 cells). As expected, at both temperatures, >99% of the cells showed exclusively PM localization profiles.

For panel (B), 23-120 cells were imaged for each mutant at each temperature. For each mutant and condition, >93% of the cells imaged showed exclusive PM localization for the indicated GFP-nodulin reporter. GFP-nodulin profiles were also imaged in WT yeast at 22°C (aggregate of 81 cells) and 37°C (aggregate of 114 cells). As expected, at both temperatures, >99% of the cells showed exclusively PM localization profiles.



# Figure S1

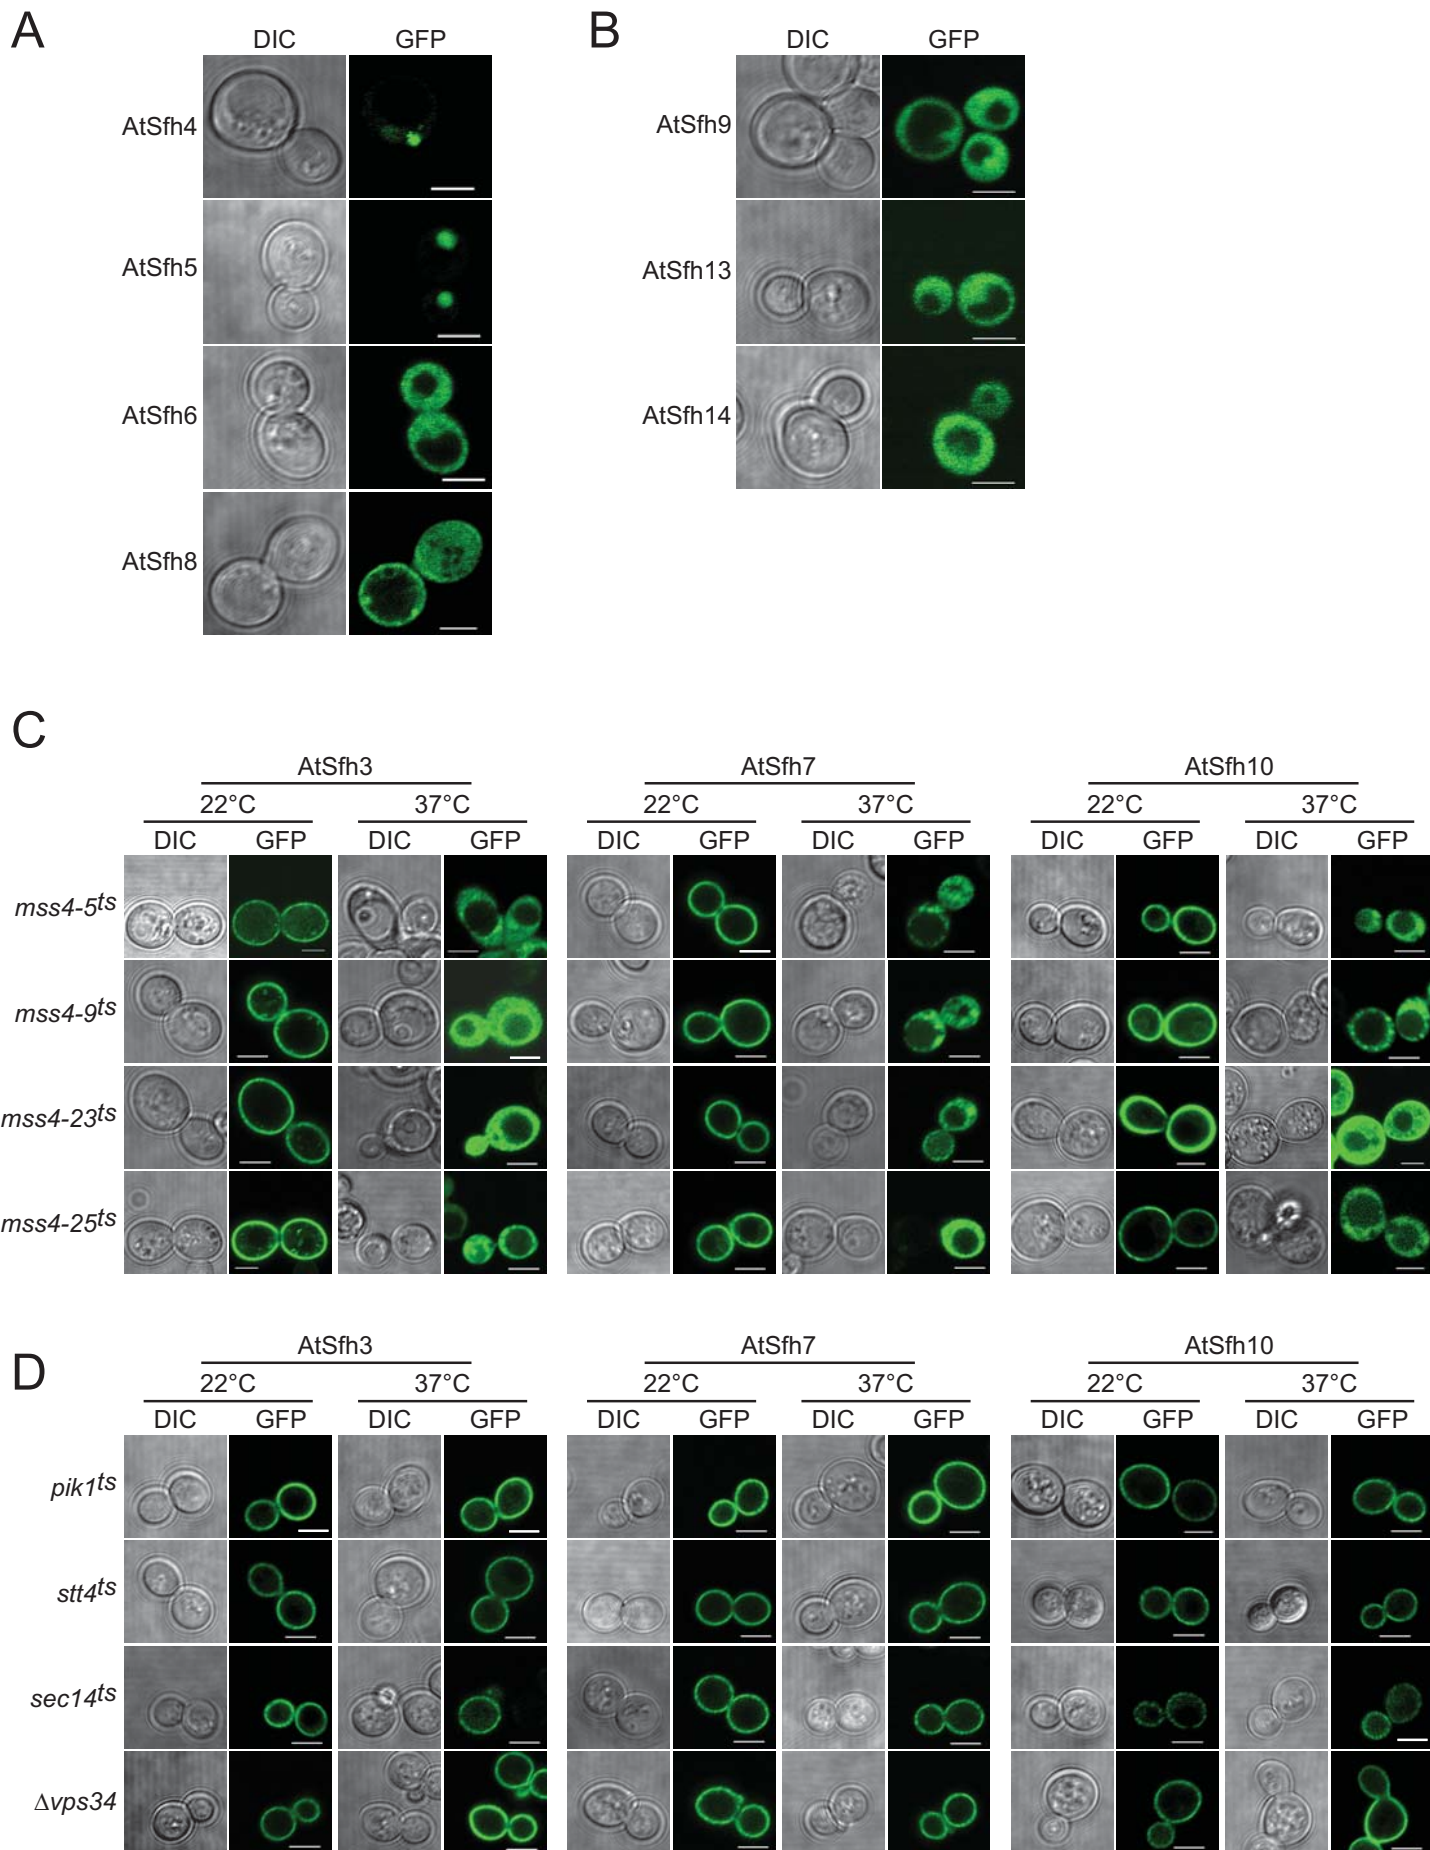

Figure S2

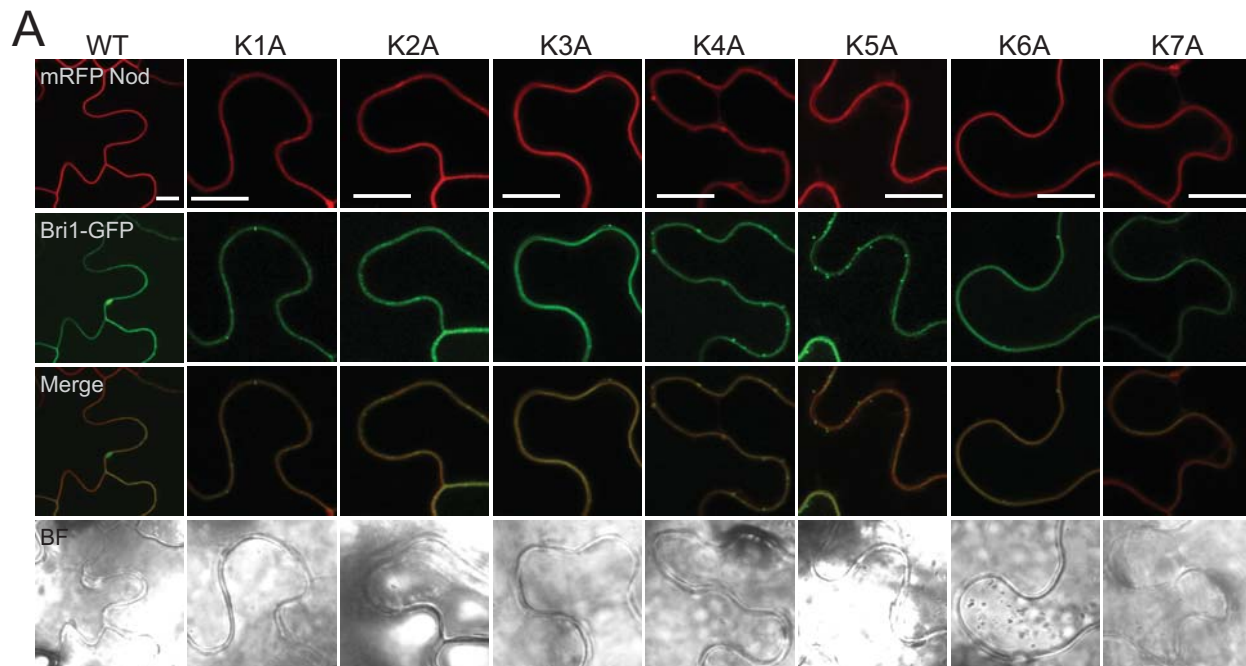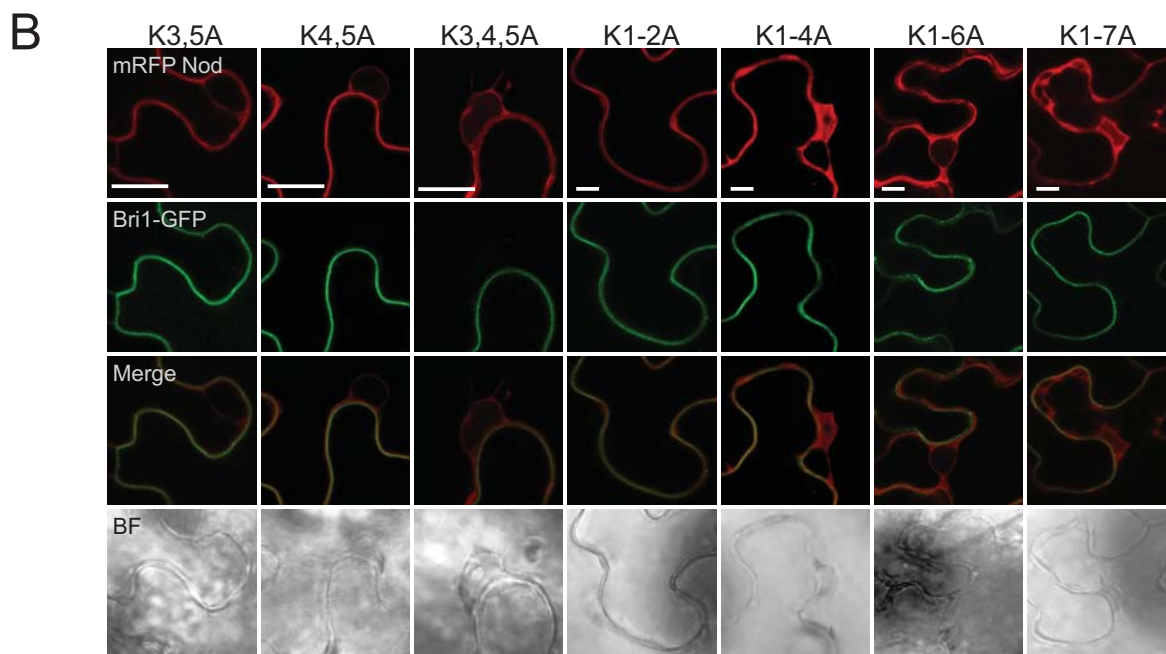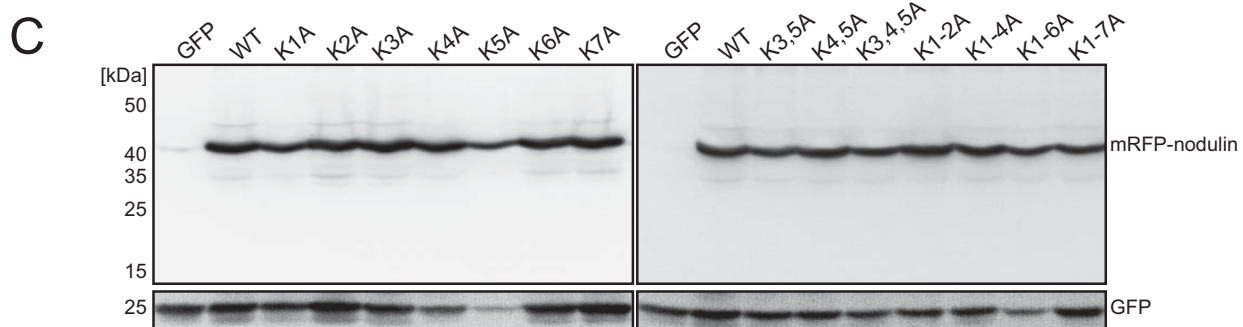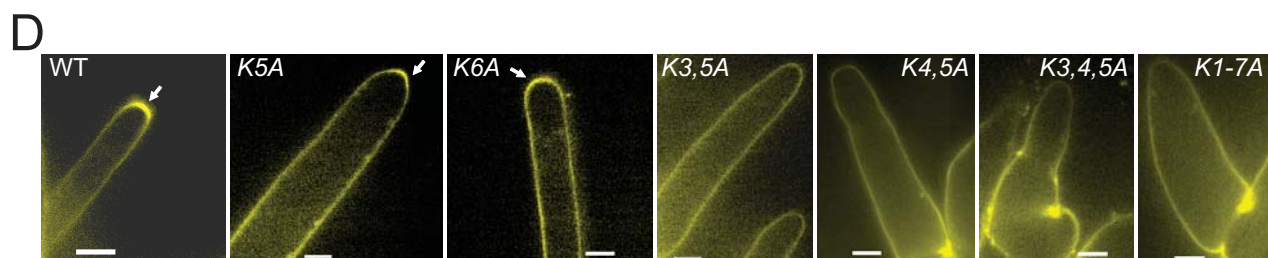

Figure S3

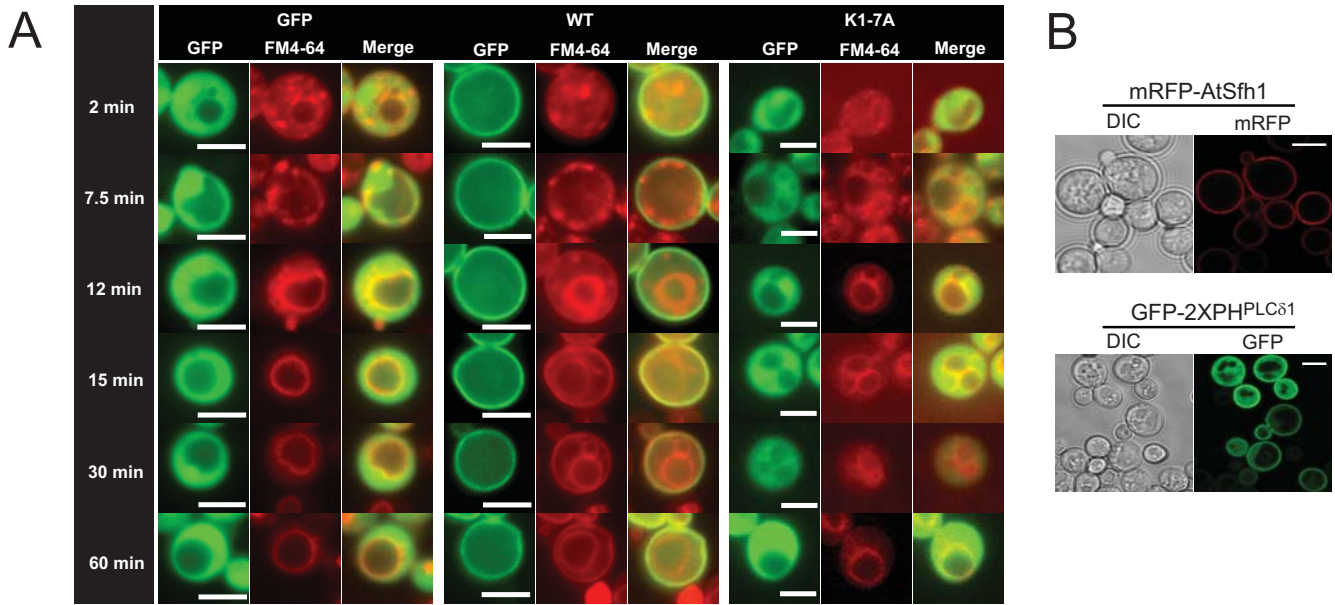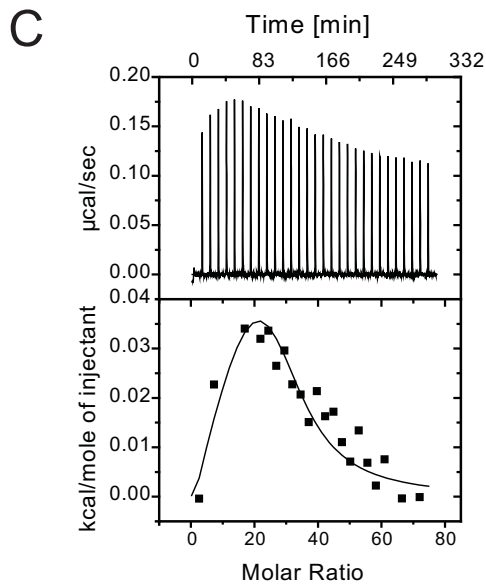

**D**

|                       | WT                         | K5A                       | K35A                      |
|-----------------------|----------------------------|---------------------------|---------------------------|
| N1                    | $0.915 \pm 0.2$            | $1.2 \pm 0.4$             | $0.9 \pm 0.2$             |
| K1                    | $5.4 \pm 0.03 \cdot 10^4$  | $2.4 \pm 0.15 \cdot 10^4$ | $1.7 \pm 0.1 \cdot 10^4$  |
| $\Delta H1$ (cal/mol) | $-1.4 \pm 0.05 \cdot 10^5$ | $-8.0 \pm 2.0 \cdot 10^4$ | $-3.3 \pm 0.9 \cdot 10^4$ |
| N2                    | $27 \pm 0$                 | $19 \pm 2$                | $23.6 \pm 14$             |
| K2                    | $5.1 \pm 0.16 \cdot 10^4$  | $2.4 \pm 0.5 \cdot 10^4$  | $1.6 \pm 0.2 \cdot 10^4$  |
| $\Delta H2$ (cal/mol) | $4.7 \pm 0.9 \cdot 10^3$   | $4.0 \pm 1.2 \cdot 10^3$  | $3.6 \pm 1.5 \cdot 10^3$  |

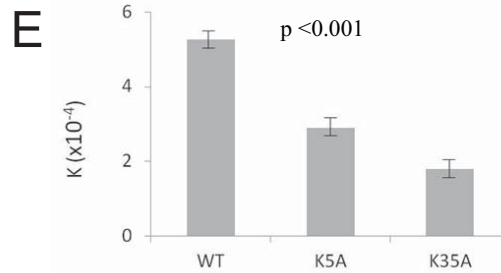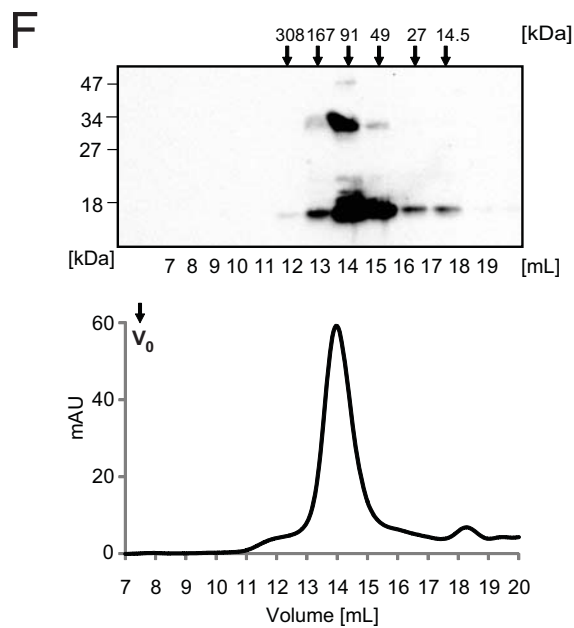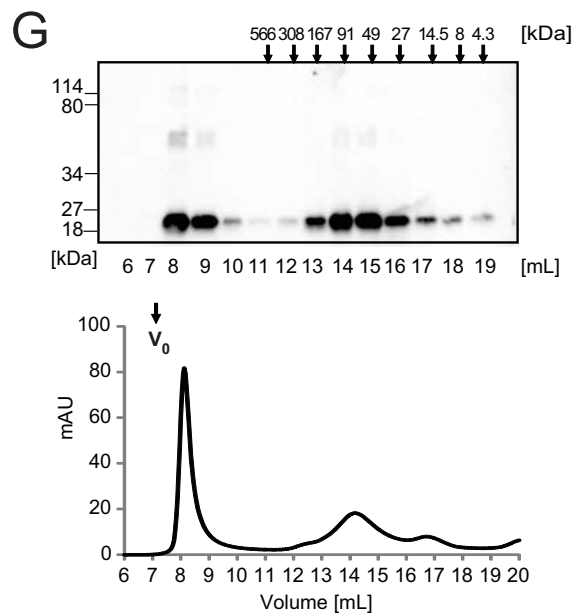

Figure S4

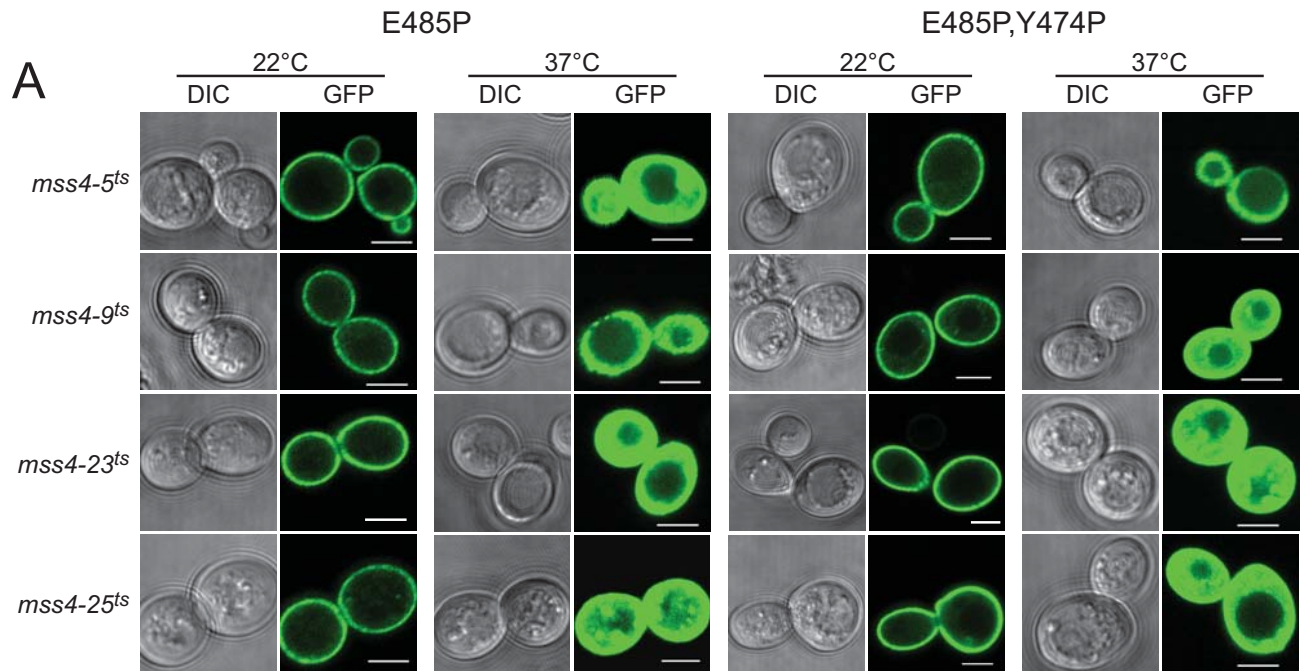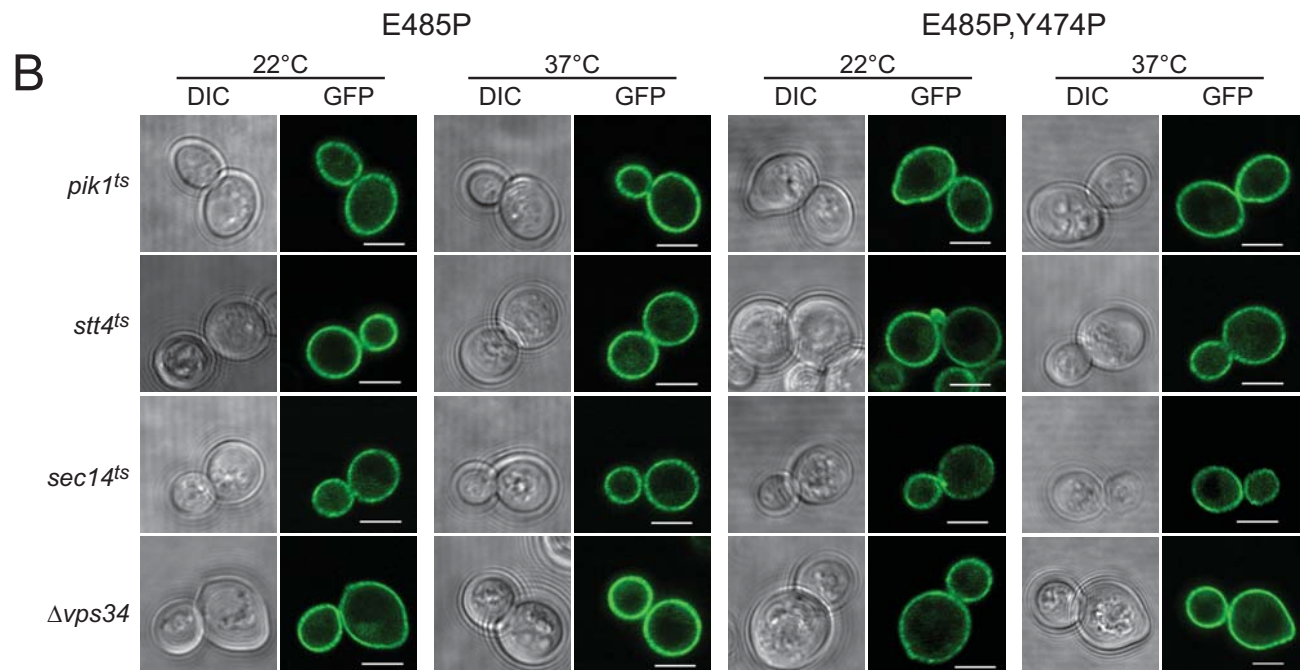

**Table S1****A**

| System / number of molecules | AtSfh1 | DLPC | DLPS | PIP <sub>2</sub> | water | Na <sup>+</sup> | Cl <sup>-</sup> | Simulation time (microseconds) |
|------------------------------|--------|------|------|------------------|-------|-----------------|-----------------|--------------------------------|
| 1                            | 1      | 0    | 0    | 0                | 2423  | 0               | 7               | 4                              |
| 2                            | 1      | 76   | 40   | 12               | 15439 | 124             | 43              | 1.4                            |
| 3                            | 2      | 76   | 40   | 12               | 15328 | 117             | 43              | 1.4                            |
| 4                            | 4      | 76   | 40   | 12               | 15184 | 103             | 43              | 1.2                            |
| 5                            | 2      | 76   | 40   | 12               | 14842 | 116             | 40              | 1.0                            |
| 6                            | 8      | 76   | 40   | 12               | 14354 | 80              | 40              | 1.0                            |

Composition of simulated systems. Peptide in the systems 2-4 was unstructured in the beginning of the simulation, and in the systems 5 and 6 taken from the end (at four microseconds) of the simulation 1.

**B**

| Residue | Group                         | PIP <sub>2</sub> | PS   | PC   |
|---------|-------------------------------|------------------|------|------|
| 1LYS    | PP(PIP <sub>2</sub> )/COO(PS) | 0.67             | 0.20 | -    |
|         | P                             | 0.02             | 0    | 0.16 |
|         | OC-Ca                         | 0                | 0    | 0    |
| 2LYS    | PP(PIP <sub>2</sub> )/COO(PS) | 0.12             | 0.53 | -    |
|         | P                             | 0.14             | 0.12 | 0.16 |
|         | OC-Ca                         | 0                | 0    | 0    |
| 3LYS    | PP(PIP <sub>2</sub> )/COO(PS) | 0.40             | 0.10 | -    |
|         | P                             | 0                | 0    | 0.23 |
|         | OC-Ca                         | 0                | 0    | 0    |
| 4LYS    | PP(PIP <sub>2</sub> )/COO(PS) | 0.52             | 0.35 | -    |
|         | P                             | 0                | 0.18 | 0.17 |
|         | OC-Ca                         | 0                | 0    | 0    |
| 5LYS    | PP(PIP <sub>2</sub> )/COO(PS) | 0.47             | 0.22 | -    |
|         | P                             | 0                | 0.18 | 0.31 |
|         | OC-Ca                         | 0                | 0    | 0    |
| 6LYS    | PP(PIP <sub>2</sub> )/COO(PS) | 0.40             | 0.30 | -    |
|         | P                             | 0                | 0.25 | 0.43 |
|         | OC-Ca                         | 0                | 0    | 0    |
| 7LYS    | PP(PIP <sub>2</sub> )/COO(PS) | 0.50             | 0.22 | -    |
|         | P                             | 0                | 0    | 0.11 |
|         | OC-Ca                         | 0                | 0    | 0    |
| 8LYS    | PP(PIP <sub>2</sub> )/COO(PS) | 0                | 0    | -    |
|         | P                             | 0                | 0    | 0    |
|         | OC-Ca                         | 0                | 0    | 0    |
| 9PHE    | PP(PIP <sub>2</sub> )/COO(PS) | 0                | 0    | -    |
|         | P                             | 0                | 0    | 0    |
|         | OC-Ca                         | 0                | 0    | 0    |
| 10PHE   | PP(PIP <sub>2</sub> )/COO(PS) | 0                | 0    | -    |
|         | P                             | 0                | 0    | 0    |
|         | OC-Ca                         | 0                | 0    | 0    |
| 11GLY   | PP(PIP <sub>2</sub> )/COO(PS) | 0                | 0    | -    |
|         | P                             | 0                | 0    | 0    |
|         | OC-Ca                         | 0                | 0    | 0    |
| 12PHE   | PP(PIP <sub>2</sub> )/COO(PS) | 0                | 0    | -    |
|         | P                             | 0                | 0    | 0    |
|         | OC-Ca                         | 0                | 0    | 0    |

Average (300-1000 ns from systems 2-6 in Table S1) number of hydrogen bonds formed by peptides with lipids. Here, PP refers to inositol phosphate, P refers to lipids, OC refers to carbonyl group of lipids (see Fig. 4).

**C**

| Number of PIP <sub>2</sub> sequestered by the peptide | Average |
|-------------------------------------------------------|---------|
| 0                                                     | 5.91%   |
| 1                                                     | 27.51%  |
| 2                                                     | 34.90%  |
| 3                                                     | 33.18%  |
| 4                                                     | 3.69%   |

Probability for the number of PIP<sub>2</sub> lipids bound to the peptide during 300-1000 ns.

**D**

| PtdIns type               | Number of hydrogen bonds |
|---------------------------|--------------------------|
| PtdIns(4,5)P <sub>2</sub> | 38.67 (+/- 0.02)         |
| PtdIns(3,5)P <sub>2</sub> | 27.55 (+/- 0.01)         |

Average number of hydrogen bonds between 8 peptides and PtdIns present in the system (in 200– 500 ns).

**E**

| Seedling Type               | Root hair (RH) size | Double RH% (DRH) | Notch RH% | Triple RH% (TRH) |
|-----------------------------|---------------------|------------------|-----------|------------------|
| WT                          | 158.16±115.16       | 0                | 0         | 0                |
| <i>Atsfh1<sup>0/0</sup></i> | 42.48±26.18         | 37.25            | 0         | 0                |
| <i>AtSFH1</i>               | 153.83±109.39       | 0                | 0         | 0                |
| <i>K<sub>5</sub>A</i>       | 104.3±80.47         | 9.63             | 2.52      | 0.485            |
| <i>K<sub>6</sub>A</i>       | 69.29±56.86         | 13.88            | 12.77     | 0                |
| <i>K<sub>3,5</sub>A</i>     | 53.89±28.40         | 48.55            | 0         | 0.57             |
| <i>K<sub>4,5</sub>A</i>     | 38.40±22.32         | 43.10            | 0.63      | 1.07             |
| <i>K<sub>3,4,5</sub>A</i>   | 28.17±18.19         | 32.4             | 0         | 0.67             |
| <i>K<sub>1,7</sub>A</i>     | 39.37±25.7          | 47.83            | 0         | 0.49             |

Root hair lengths (RH), frequencies of double root hairs (DRH), notched root hairs, and triple root hairs (TRH) are given for 3-day old seedlings of wild-type and *Atsfh1<sup>0/0</sup>* plants (positive and negative parental controls, respectively). The same parameters are given for T<sub>3</sub> *Atsfh1<sup>0/0</sup>* plants reconstituted for expressing of WT AtSFH1 or mutant *Atsfh1* transgenes harboring the indicated C-terminal Lys-Ala (K→A) missense substitution mutations.
